# Supplementary material
Source: publisher site journal article supplement (https://www.dovepress.com/article/567029)
Supplement: Supplementary file 1 [file Appendix%20S1_1.docx]

**Appendix S1**

Identification and Determination of the Frailty Development Trajectory in Elderly Patients after PCI

The frailty scores of elderly patients at four time points following PCI were fitted, and LCGM models with 1 to 5 classes were progressively established. The results indicated that when the number of classes was increased to three, the AIC, BIC, and aBIC all reached their minimum values. The P-values for both LMRT and BLRT achieved statistical significance, and the entropy value was greater than 0.700 (0.858). Considering both practical relevance and data indicators, the three-class model was chosen as the optimal model for this study. The model fitting results are presented in Appendix Table S1.

**Appendix Table S1 Fit indices of the LCGM for the total frailty scores of elderly patients after PCI**

| **Class** | **AIC** | **BIC** | **aBIC** | **Entropy** | **LMR**  **（*P-*value）** | **BLRT**  **（*P-*value）** | **Class Probability** |
| --- | --- | --- | --- | --- | --- | --- | --- |
| 1 | 4385.546 | 4423.269 | 4388.406 | — | — | — | — |
| 2 | 4368.181 | 4416.192 | 4371.822 | 0.760 | ＜0.001 | ＜0.001 | 0.433/0.566 |
| 3 | 4352.294 | 4410.593 | 4356.715 | 0.858 | ＜0.001 | ＜0.001 | 0.376/0.326/0.298 |
| 4 | 4353.627 | 4422.214 | 4358.827 | 0.828 | ＜0.001 | 0.342 | 0.054/0.275/0.321/0.350 |
| 5 | 4357.251 | 4436.126 | 4363.232 | 0.793 | ＜0.001 | 0.677 | 0.155/0.246/0.337  /0.039/0.223 |
